# Supplementary material for: A Lack of Premature Termination Codon Read-Through Efficacy of PTC124 (Ataluren) in a Diverse Array of Reporter Assays
Source: PLoS Biol. 2013 Jun 25;11(6):e1001593. doi: 10.1371/journal.pbio.1001593 (PMC3692445; doi:10.1371/journal.pbio.1001593)

Figure S3

PROTON.d DMSO {C:\Bruker\TOPSPIN} IG500 5

PTC-124

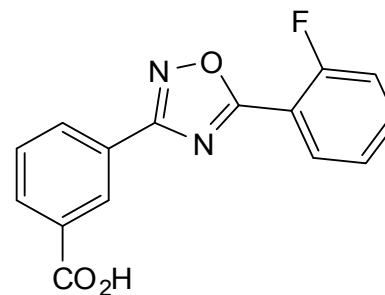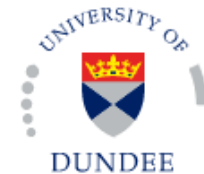

Current Data Parameters  
NAME IG-GW-PTC-124  
EXPNO 2  
PROCNO 1

F2 - Acquisition Parameters  
Date\_ 20120210  
Time 10.25  
INSTRUM spect  
PROBHD 5 mm QNP 1H/13  
PULPROG zg30  
TD 65536  
SOLVENT DMSO  
NS 16  
DS 2  
SWH 10330.578 Hz  
FIDRES 0.157632 Hz  
AQ 3.1719923 sec  
RG 724  
DW 48.400 usec  
DE 6.00 usec  
TE 293.3 K  
D1 1.00000000 sec  
TD0 1

===== CHANNEL f1 =====  
NUC1 1H  
P1 11.20 usec  
PL1 -1.00 dB  
SFO1 500.1330885 MHz

F2 - Processing parameters  
SI 65536  
SF 500.1299952 MHz  
WDW EM  
SSB 0  
LB 0.30 Hz  
GB 0  
PC 1.40

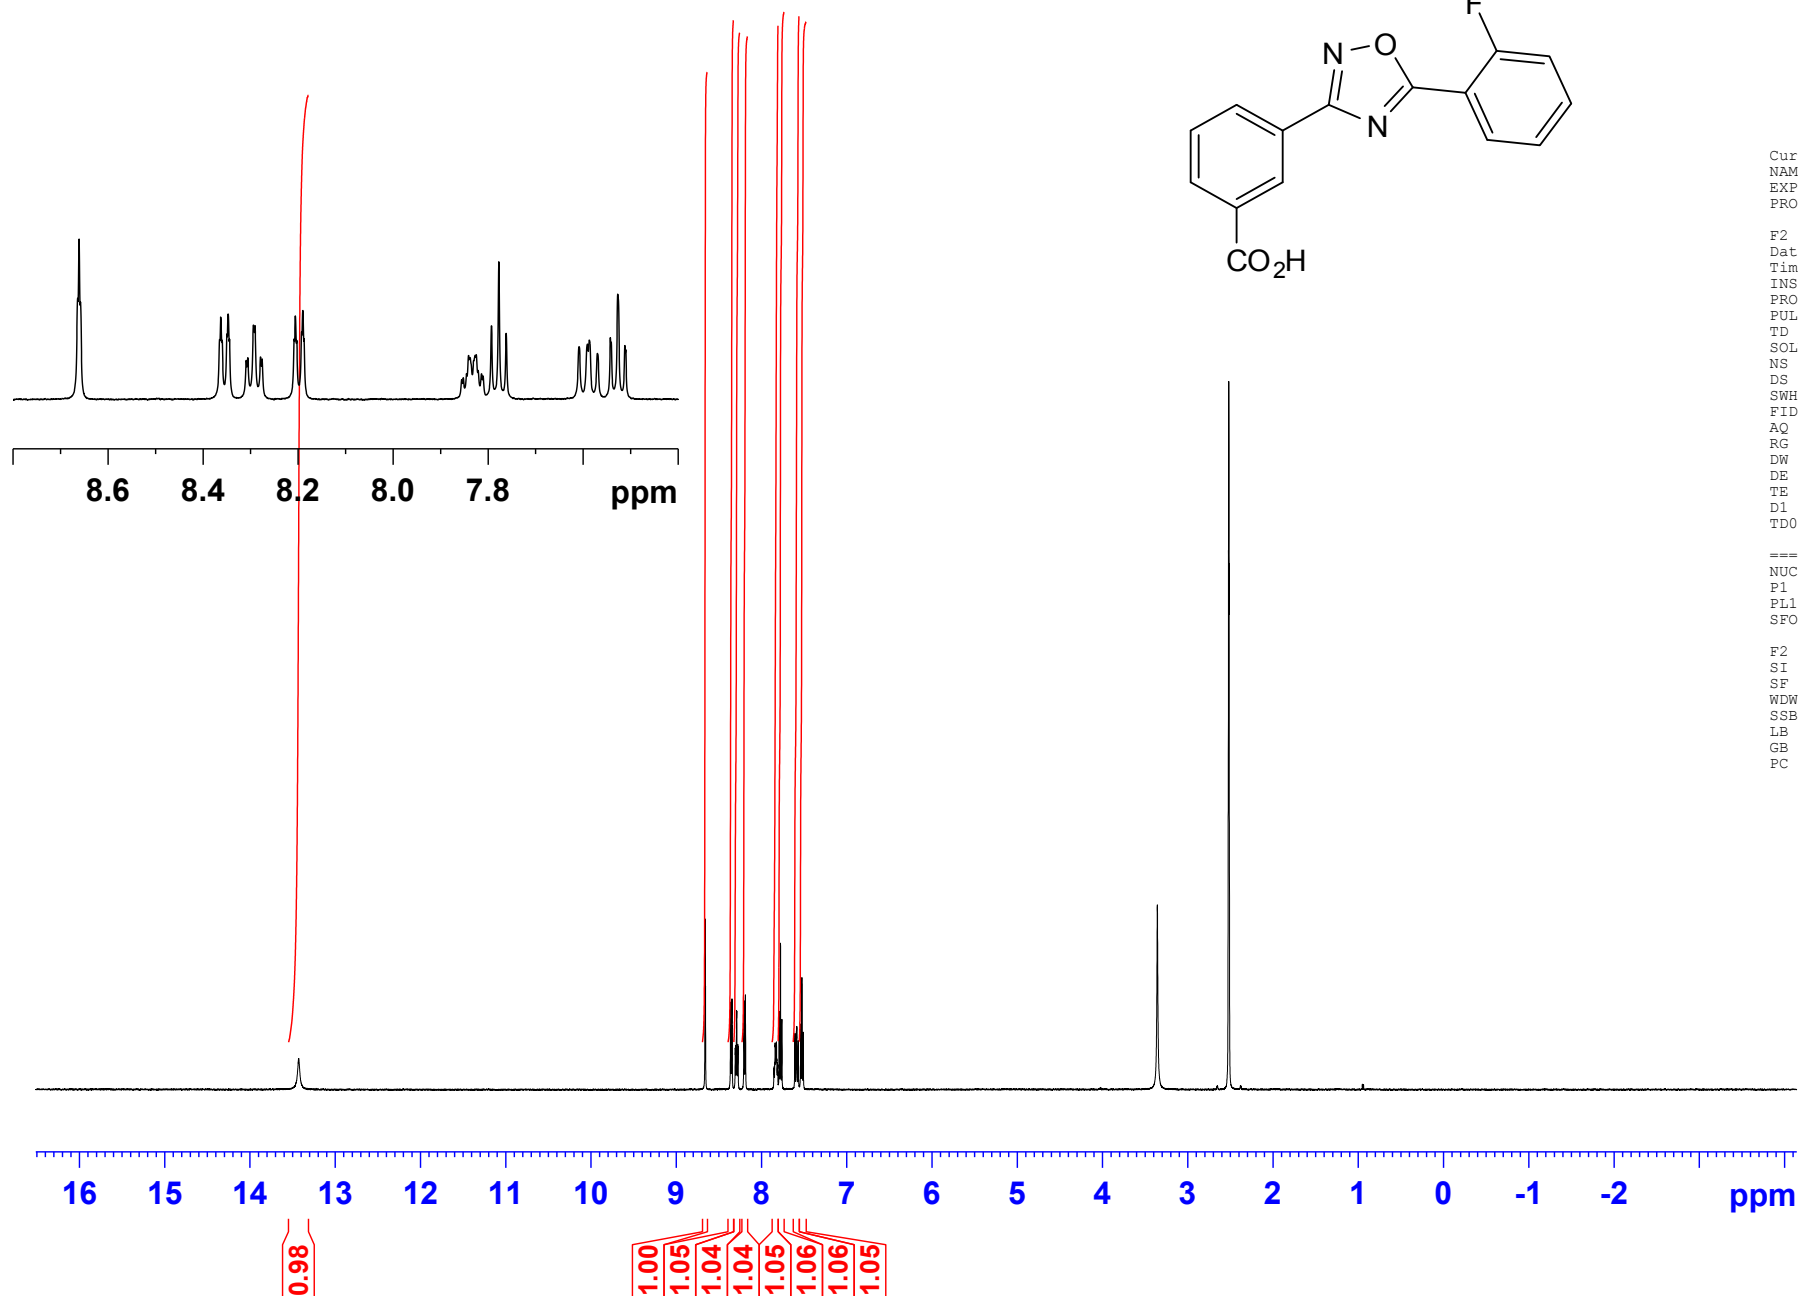

Supplement: Figure S3 — NMR analysis of PTC124. (PDF) [file pbio.1001593.s003.pdf]
