# Supplementary material for: A Lack of Premature Termination Codon Read-Through Efficacy of PTC124 (Ataluren) in a Diverse Array of Reporter Assays
Source: PubMed Central journal article supplement (PMC3692445; doi:10.1371/journal.pbio.1001593), 2013-06-25

Figure S1

## Reporter construct

## Readout

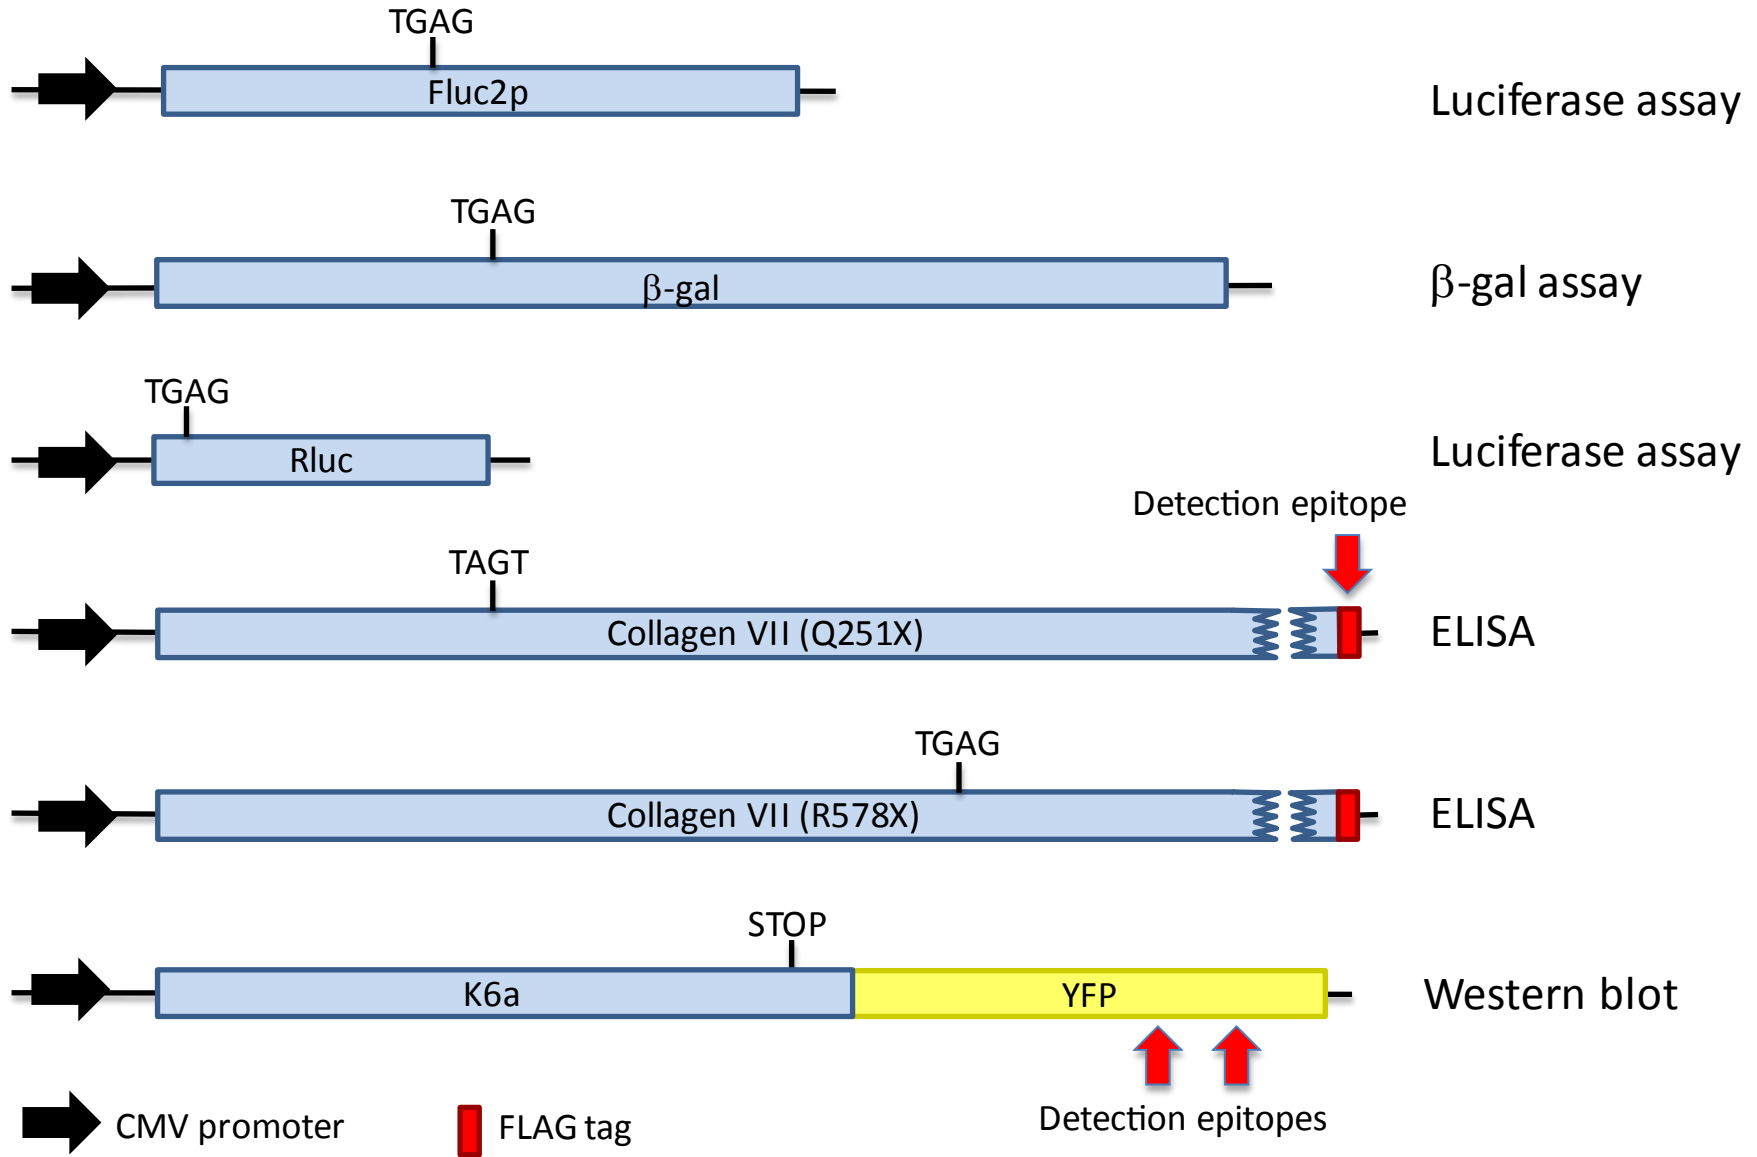

Supplement: pbio.1001593.s001.pdf [file pbio.1001593.s001.pdf]
