# Supplementary material for: A Lack of Premature Termination Codon Read-Through Efficacy of PTC124 (Ataluren) in a Diverse Array of Reporter Assays
Source: PubMed Central journal article supplement (PMC3692445; doi:10.1371/journal.pbio.1001593), 2013-06-25
Supplement: pbio.1001593.s002.pdf [file pbio.1001593.s002.pdf]

## Chromatogram List Report

## Analysis Info

Analysis Name D:\Data\ian gilbert\gw\PTC-124\_3\_01\_46163.d  
Method vialxbridge\_5-95\_acetonitrile\_7.5mins.m  
Sample Name PTC-124  
Comment

Acquisition Date 10/02/2012 10:03:54

Operator Administrator  
Instrument micrOTOF 101

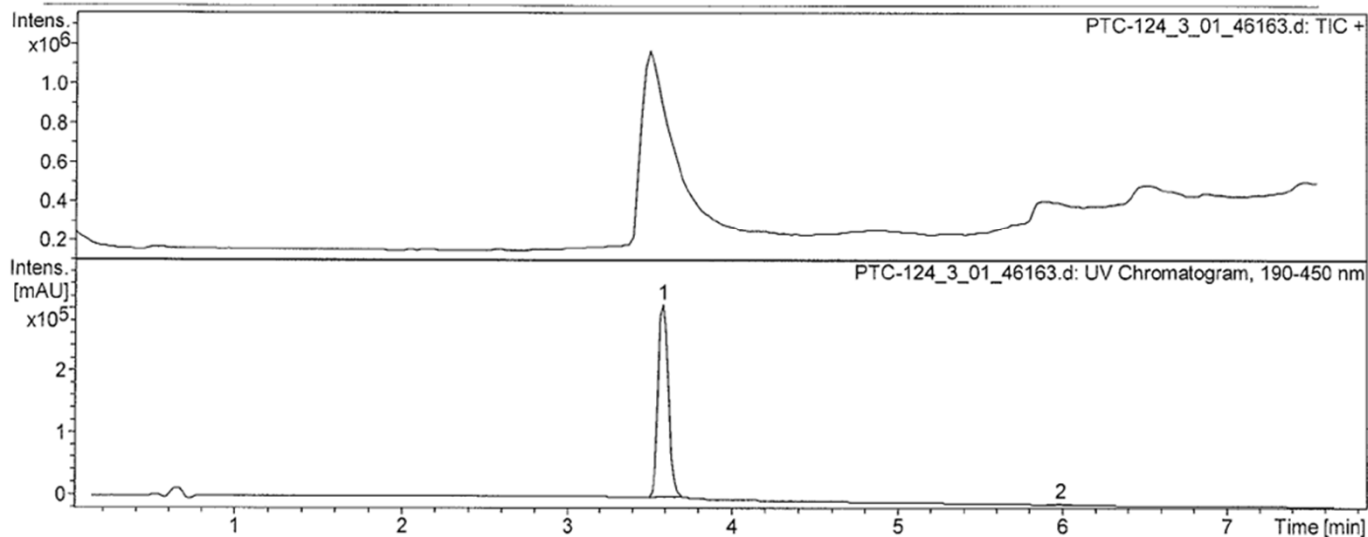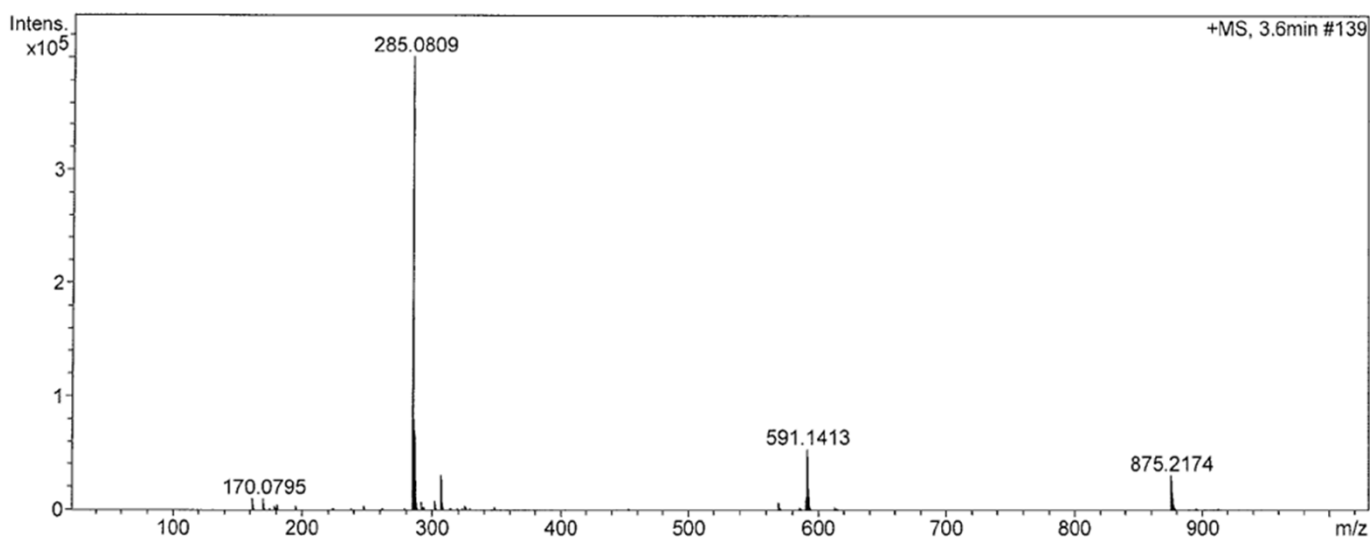

| #    | RT [min] | Area      | Area Frac. % |
|------|----------|-----------|--------------|
| 1    | 3.6      | 1352578.6 | 99.8         |
| 2    | 6.0      | 3369.1    | 0.2          |
| n.a. | 3.6      | n.a.      | n.a.         |

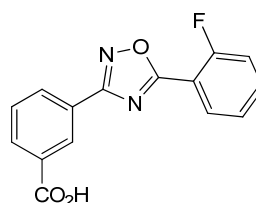

Chemical Formula: C<sub>15</sub>H<sub>9</sub>FN<sub>2</sub>O<sub>3</sub>  
Molecular Weight: 284.24
